# Supplementary material
Source: ML conference proceedings conference paper supplement (https://proceedings.neurips.cc/paper_files/paper/2023/hash/73aacd8b3b05b4b503d58310b523553c-Abstract.html)
Supplement: Supplementary file 1 [file 73aacd8b3b05b4b503d58310b523553c-Supplemental-Conference.pdf]

---

# Supplementary: Pick-a-Pic: An Open Dataset of User Preferences for Text-to-Image Generation

---

Anonymous Author(s)

Affiliation

Address

email

## 1 Appendix

### 2 Training a Scoring Function

3 We further explored an alternative loss function that is closer to CLIP’s original objective. In this loss  
4 function, we also incorporate the remaining examples in the batch as in-batch negatives. To elaborate,  
5 considering the notation established in Section 3 and  $y_1^k, y_2^k$  denoting the images corresponding to  
6 the  $k$ -th example in the batch, we formulate  $\hat{p}^k$  as follows:

$$\hat{p}_i^k = \frac{\exp s(x, y_i)}{\sum_k \sum_{j=1}^2 \exp s(x, y_j^k)} \quad (1)$$

7 We anticipated that this objective function would maintain the general capabilities of CLIP with  
8 minimal loss in performance. However, our findings demonstrated that PickScore significantly  
9 outperforms this objective function, as the latter only produced a scoring function that achieves an  
10 accuracy of 65.2 on the Pick-a-Pic test set.
